# Supplementary material for: Spatial-confinement induced electroreduction of CO and CO2 to diols on densely-arrayed Cu nanopyramids
Source: Royal Society of Chemistry journal article supplement (doi:10.1039/d1sc01694f), 2021-01-01
Supplement: d1sc01694f1.pdf [file d1sc01694f1.pdf]

## **Spatial-Confinement Induced Electroreduction of CO and CO<sub>2</sub> to Diols on Densely-Arrayed Cu Nanopyramids**

Ling Chen, Cheng Tang, Kenneth Davey, Yao Zheng, Yan Jiao\* and Shi-Zhang Qiao\*

School of Chemical Engineering and Advanced Materials, The University of Adelaide, South Australia 5005, Australia

Corresponding author: \* [yan.jiao@adelaide.edu.au](mailto:yan.jiao@adelaide.edu.au); [s.qiao@adelaide.edu.au](mailto:s.qiao@adelaide.edu.au)

### **This file includes:**

- **Schemes S1-S2**
- **Figures S1-S20**
- **Supplementary Notes 1-4**
- **Tables S1-S15**
- **Supplementary References**

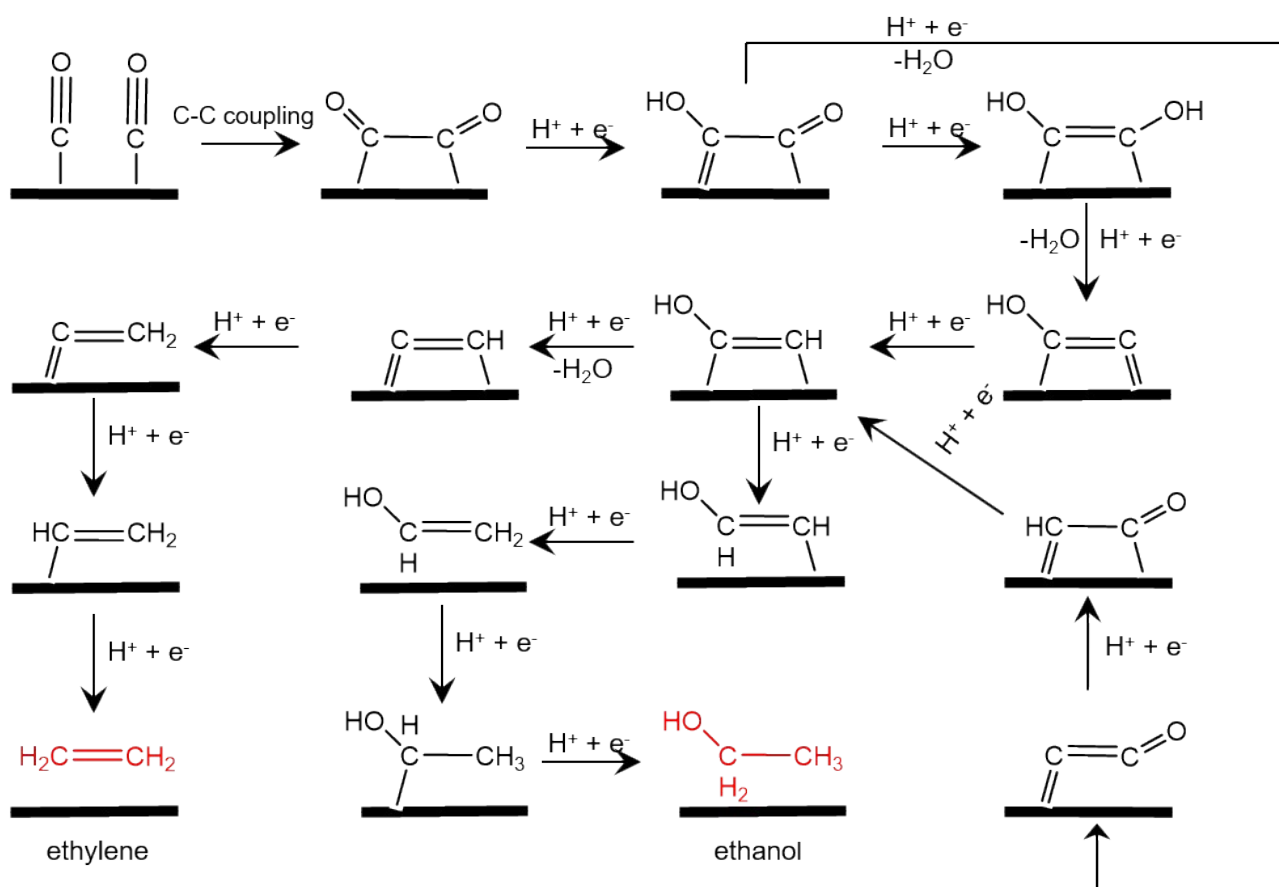

**Scheme S1.** Conventional \*COH-COH and \*C-CO pathways on Cu (100) following adsorption of two CO intermediates.<sup>1-3</sup>

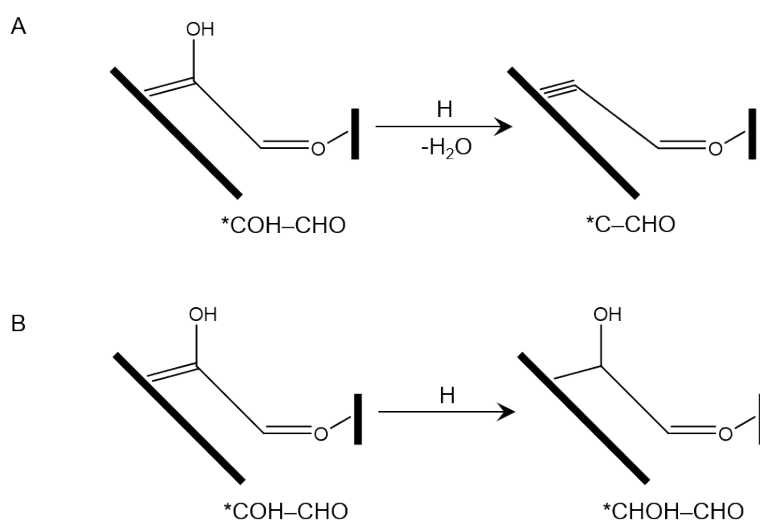

**Scheme S2.** Further hydrogenation step for \*COH-CHO on Cu-DAN to: (A) \*C-CHO, and; (B) \*CHOH-CHO.

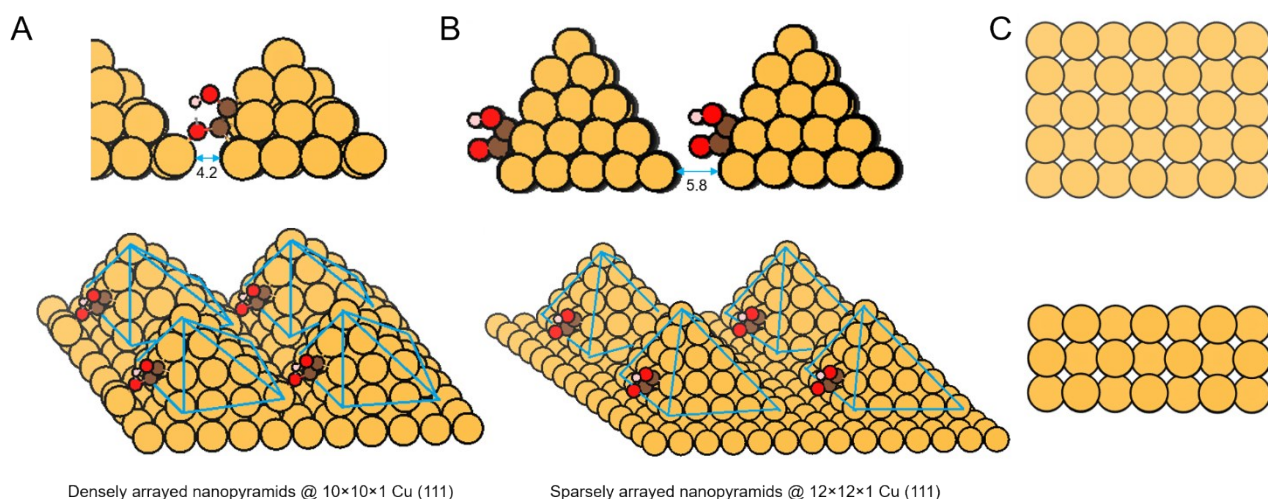

**Fig. S1.** Close-up (top panel) and overall (bottom panel) view of  $^*COH-CO$  adsorption on: (A) densely-arrayed Cu nanopyramids, (B) sparsely-arrayed Cu nanopyramids, and top and side view of (C) planar Cu (100). The [111] diamond nanopyramid was built based on a  $10 \times 10 \times 1$  Cu surface with  $4.2 \text{ \AA}$  distance between two nanopyramids to represent the dense-array, and on a  $12 \times 12 \times 1$  Cu surface to represent the sparse-array with  $5.8 \text{ \AA}$  distance. Distance in figure is  $\text{\AA}$ . Color code: Cu, orange; C, brown; O, red; H, pink. Solid-blue lines serve as a visual guide for the pyramid.

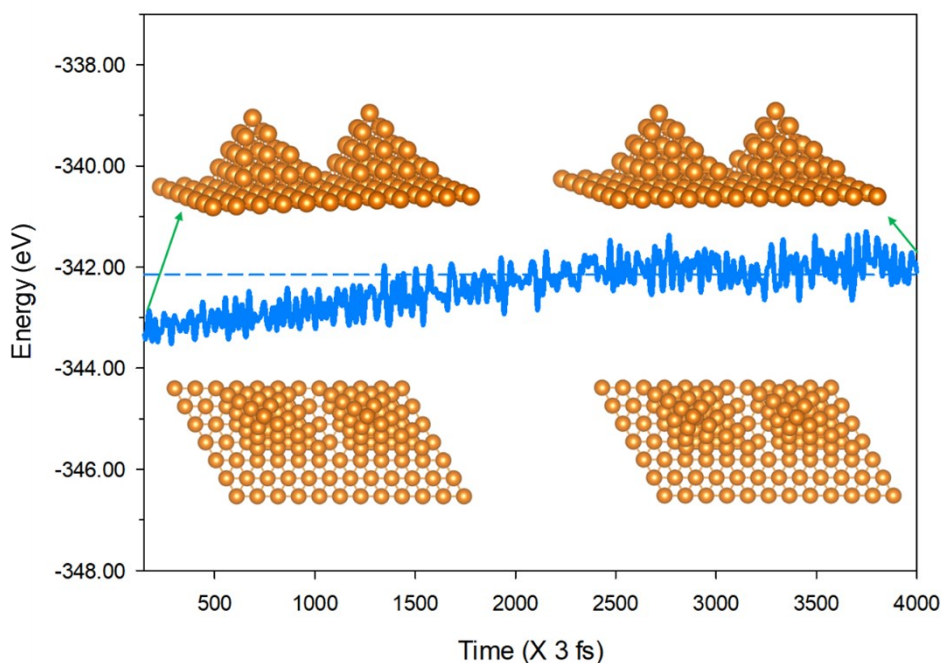

**Fig. S2.** *Ab initio* molecular dynamics (AIMD) simulated energy evolution for Cu-DAN at 300 K. Insets show the top and side views of the snapshots of atomic configurations at 0 and 12 ps. The blue dashed-line denotes equilibrium position.

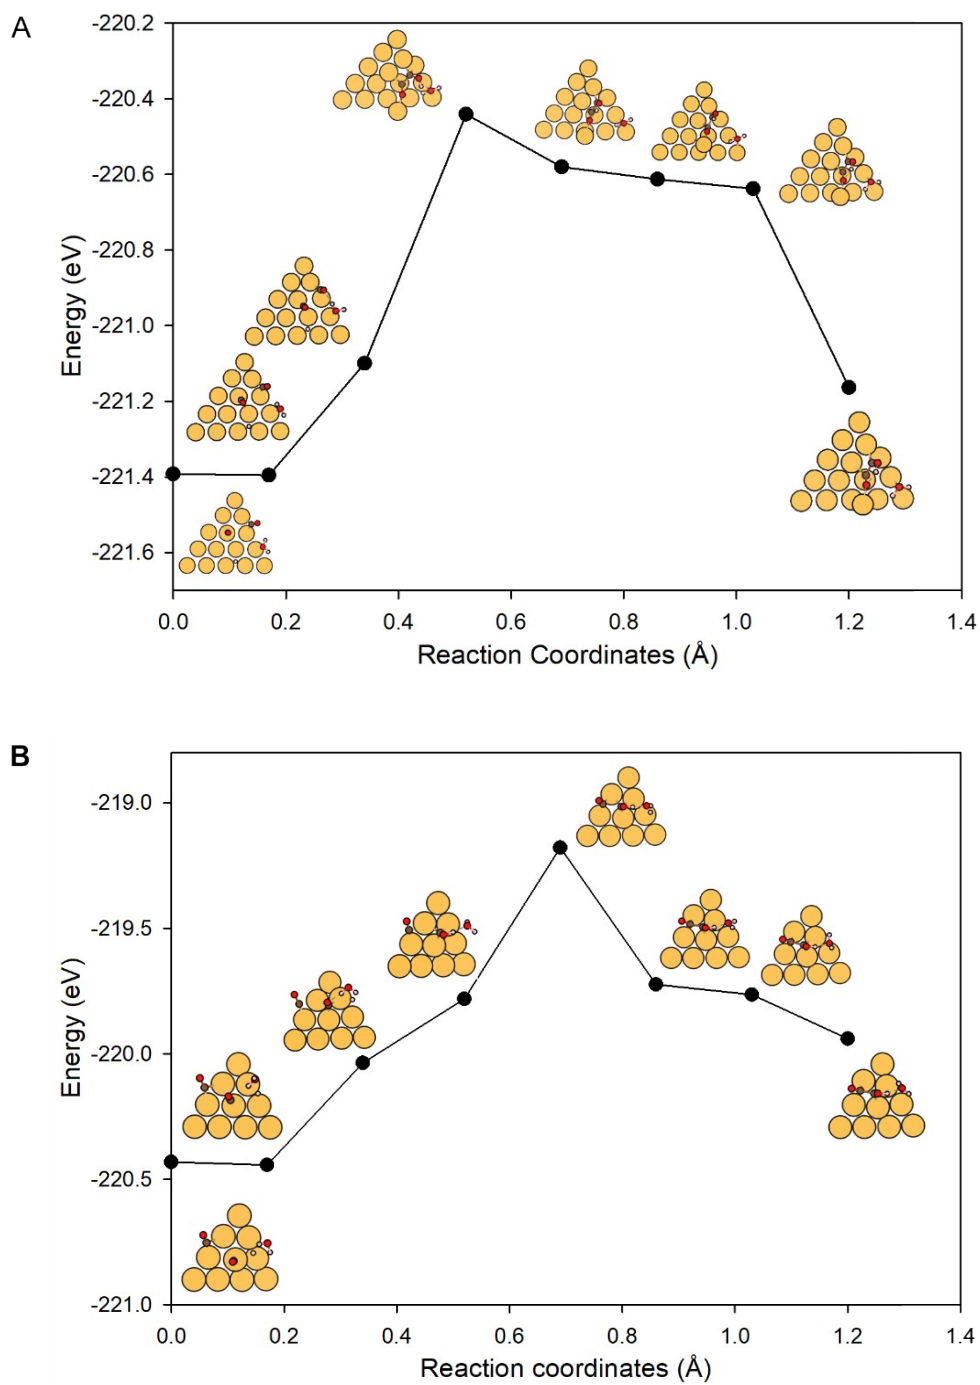

**Fig. S3.** Minimum energy path (MEP) involved in  $*CO + *CO + H^+ + e^- \rightarrow *COH-CO$  via H-shuttling on (A) Cu-DAN, and (B) Cu-SAN. Color code: Cu, orange; C, brown; O, red; H, pink. Energy barrier in (A) is  $\Delta G^\ddagger(U^0) = 1.07$  eV and in (B),  $\Delta G^\ddagger(U^0) = 1.50$  eV.

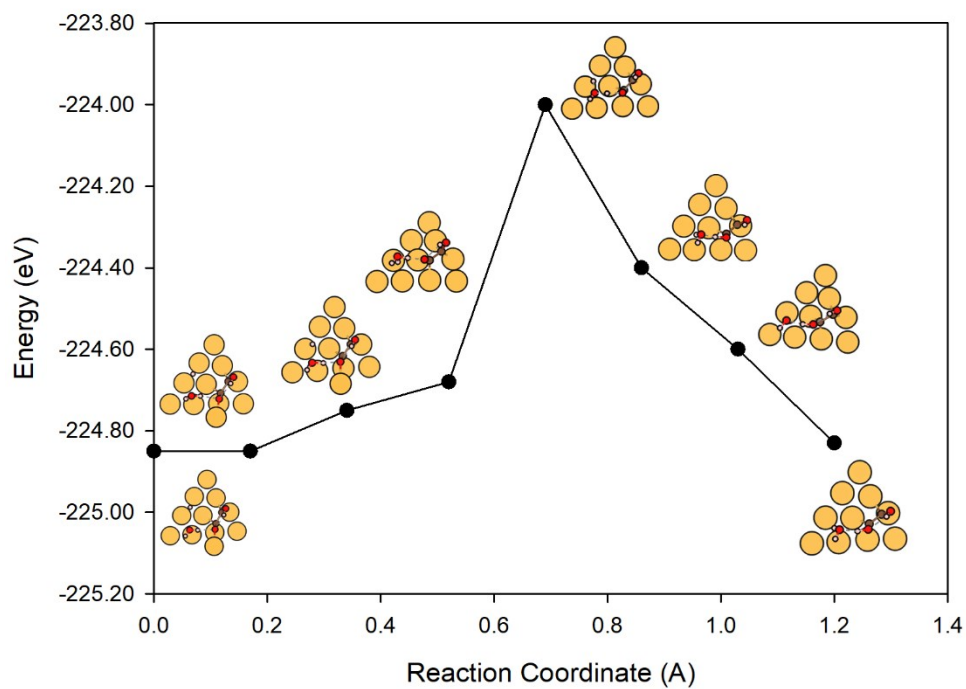

**Fig. S4.** MEP involved in  $*\text{COH-CO} + \text{H}^+ + \text{e}^- \rightarrow *\text{COH-COH}$  on Cu-DAN via H-shuttling. Color code: Cu, orange; C, brown; O, red; H, pink. Energy barrier is  $\Delta G^\ddagger(\text{U}^0) = 0.76$  eV.

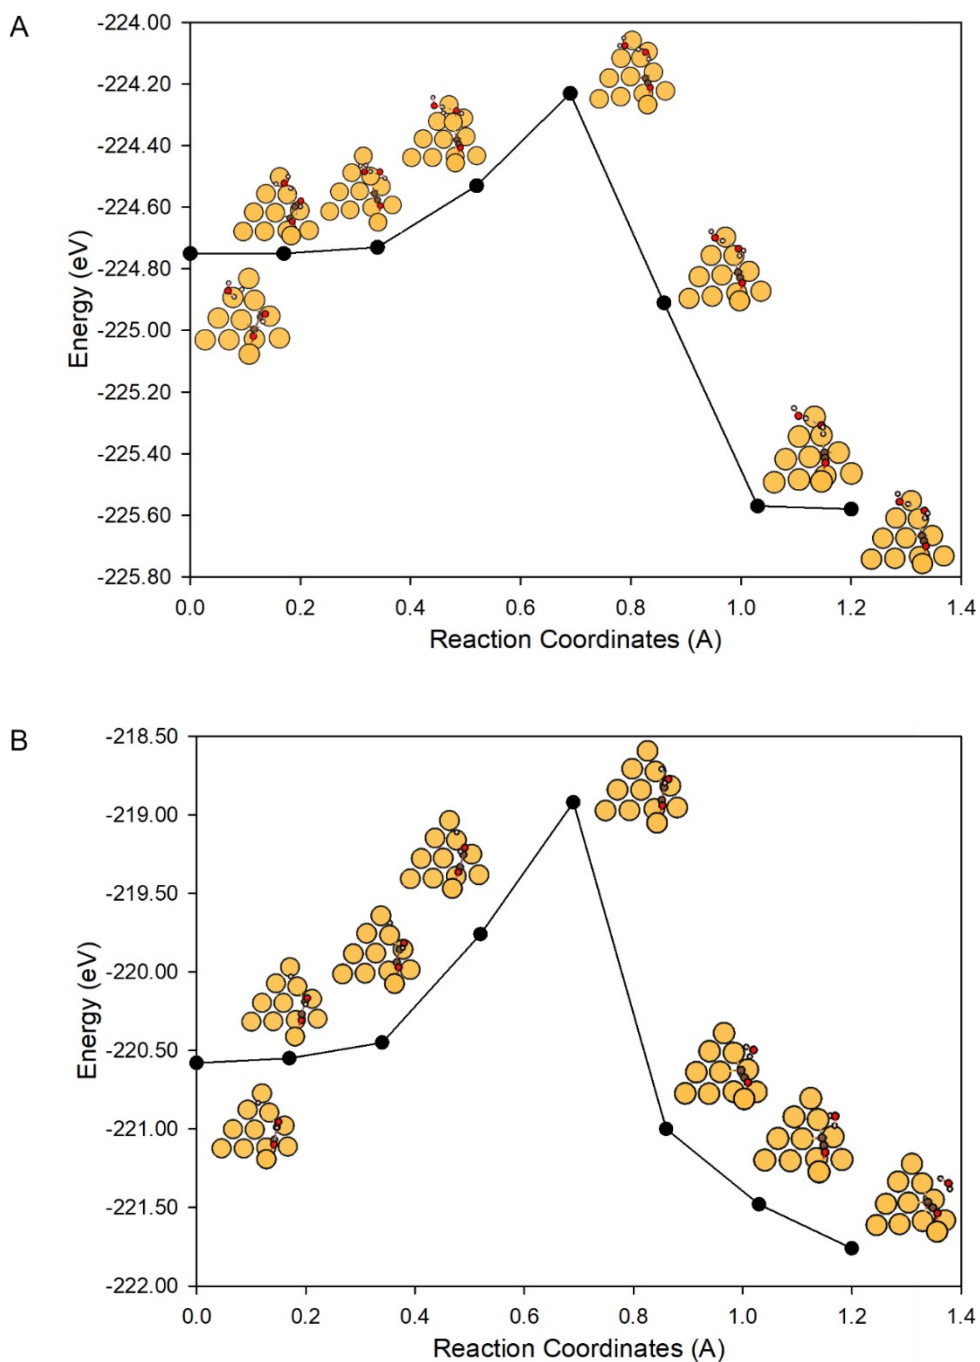

**Fig. S5.** MEP involved in  $*\text{COH-CO} + \text{H}^+ + \text{e}^- \rightarrow * \text{C-CO} + \text{H}_2\text{O}$  on Cu-DAN via (A) H-shuttling and (B) surface \*H transfer. Color code: Cu, orange; C, brown; O, red; H, pink. Energy barrier value in (A) is  $\Delta G^\ddagger(U^0) = 0.72$  eV and in (B),  $\Delta G^\ddagger(U^0) = 1.66$  eV

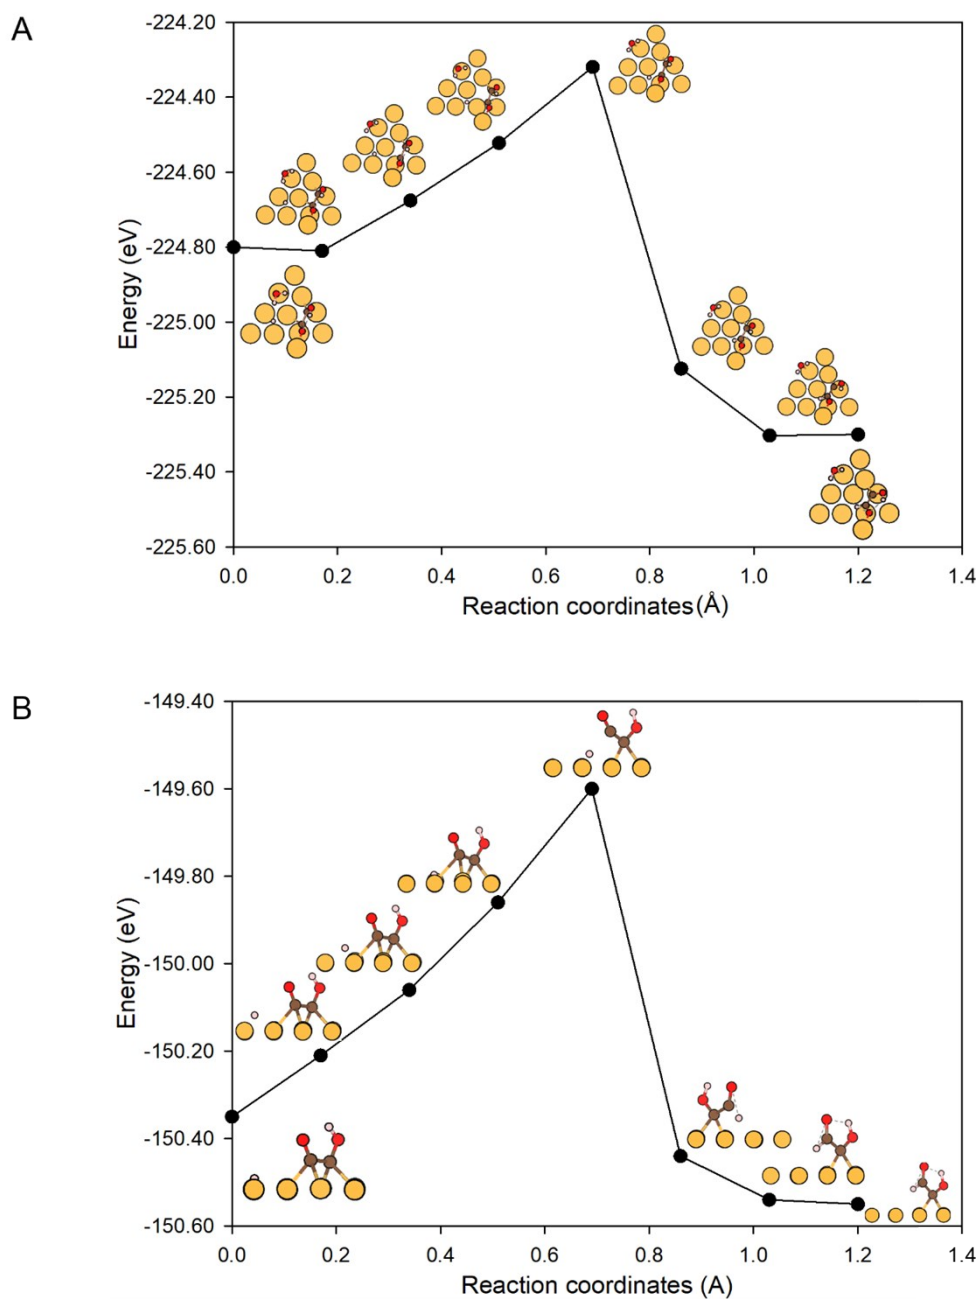

**Fig. S6.** MEP involved in  $*\text{COH-CO} + \text{H}^+ + \text{e}^- \rightarrow *\text{COH-CHO}$  via surface  $*\text{H}$  transfer on (A) Cu-DAN and (B) planar Cu (100). Color code: Cu, orange; C, brown; O, red; H, pink. Energy barrier in (A) is  $\Delta G^\ddagger(U^0) = 0.41$  eV, in (B)  $\Delta G^\ddagger(U^0) = 0.69$  eV.



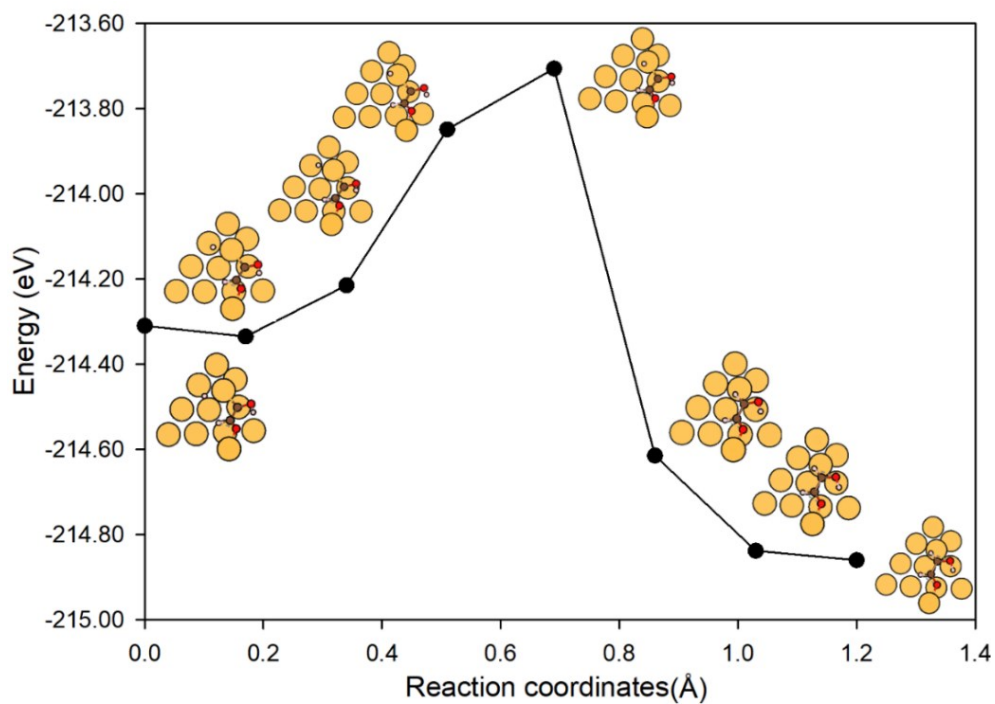

**Fig. S7.** MEP involved in  $*\text{COH-CHO} + \text{H}^+ + \text{e}^- \rightarrow *\text{CHOH-CHO}$  via surface  $*\text{H}$  transfer on Cu-DAN. Color code: Cu, orange; C, brown; O, red; H, pink. Energy barrier value is  $\Delta G^\ddagger(U^0) = 0.52$  eV.

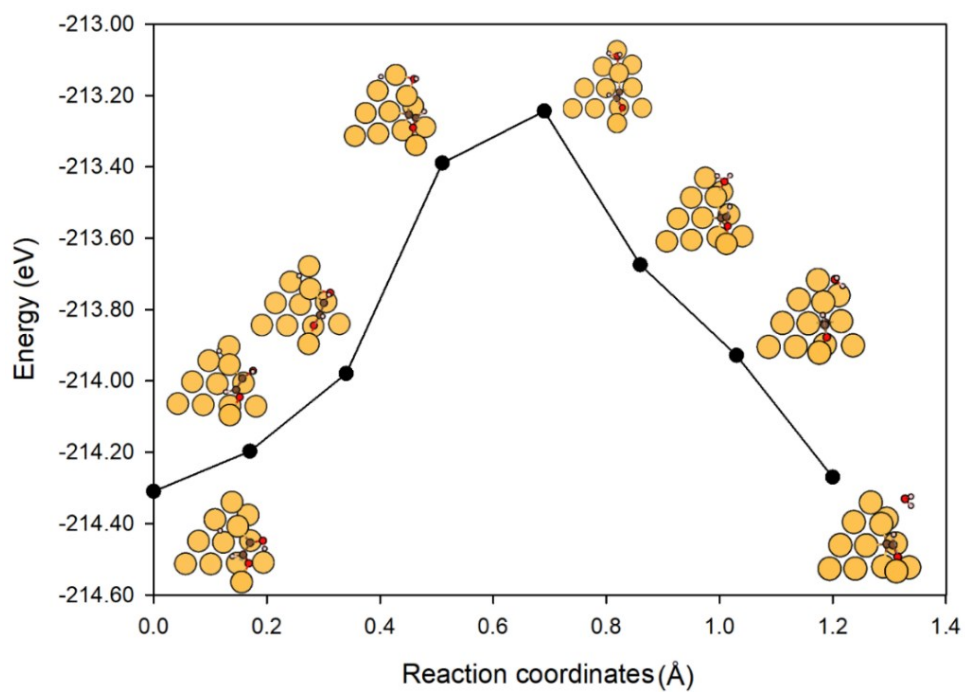



**Fig. S8.** MEP involved in  $*\text{COH-CHO} + \text{H}^+ + \text{e}^- \rightarrow * \text{C-CHO} + \text{H}_2\text{O}$  on Cu-DAN via surface  $*\text{H}$  transfer. Color code: Cu, orange; C, brown; O, red; H, pink. Energy barrier value is  $\Delta G^\ddagger(\text{U}^0) = 1.02$  eV.

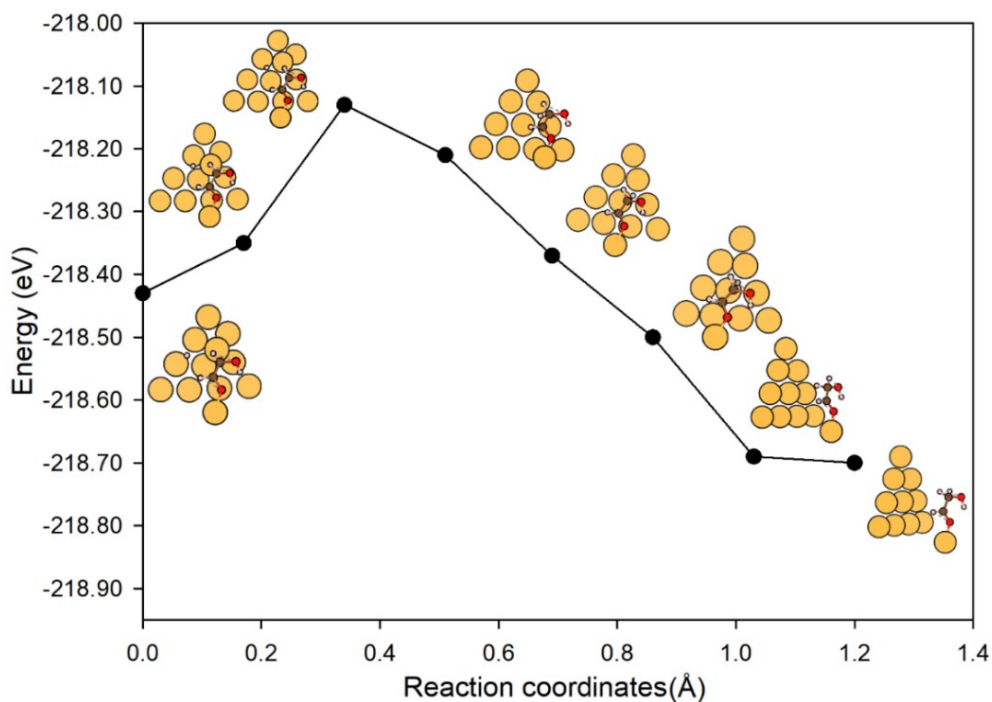

**Fig. S9.** MEP involved in  $*\text{CHOH-CHO} + \text{H}^+ + \text{e}^- \rightarrow * \text{CH}_2\text{OH-CHO}$  on Cu-DAN via surface  $*\text{H}$  transfer. Color code: Cu, orange; C, brown; O, red; H, pink. Energy barrier value is  $\Delta G^\ddagger(\text{U}^0) = 0.25$  eV.

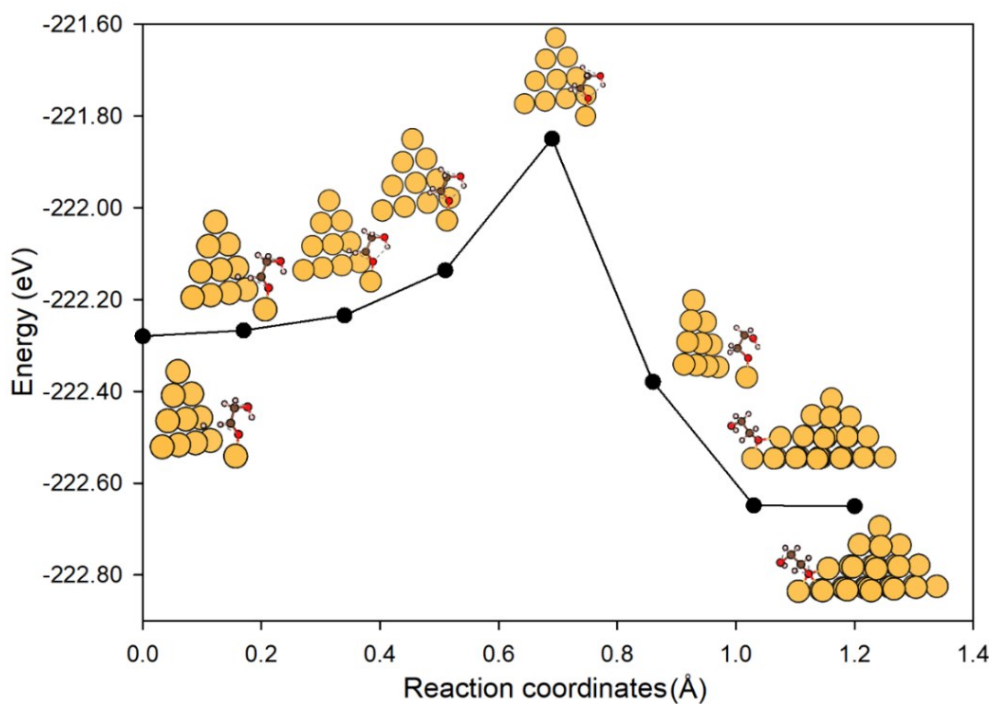

**Fig. S10.** MEP involved in  $*\text{CH}_2\text{OH}-\text{CHO} + \text{H}^+ + \text{e}^- \rightarrow *\text{CH}_2\text{OH}-\text{CH}_2\text{O}$  on Cu-DAN via surface  $*\text{H}$  transfer. Color code: Cu, orange; C, brown; O, red; H, pink. Energy barrier value is  $\Delta G^\ddagger(\text{U}^0) = 0.39$  eV.

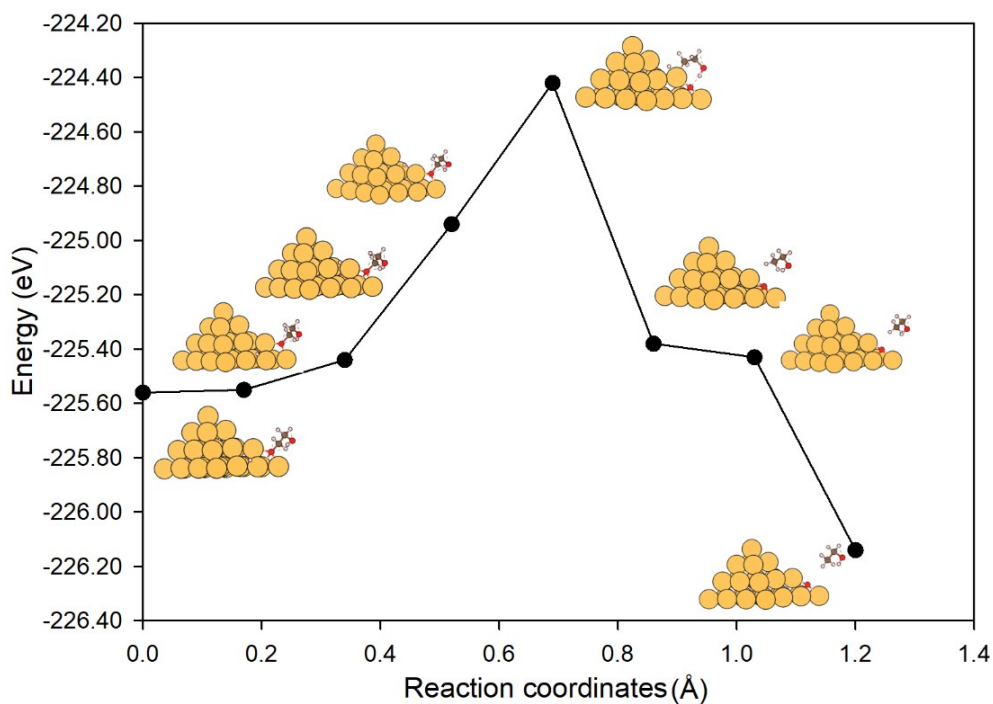

**Fig. S11.** MEP involved in  $*\text{CH}_2\text{OH}-\text{CH}_2\text{O} + \text{H}^+ + \text{e}^- \rightarrow \text{CH}_2\text{OH}-\text{CH}_3 + *\text{O}$  on Cu-DAN via surface  $*\text{H}$  transfer. Color code: Cu, orange; C, brown; O, red; H, pink. Energy barrier value is  $\Delta G^\ddagger(\text{U}^0) = 0.98$  eV.

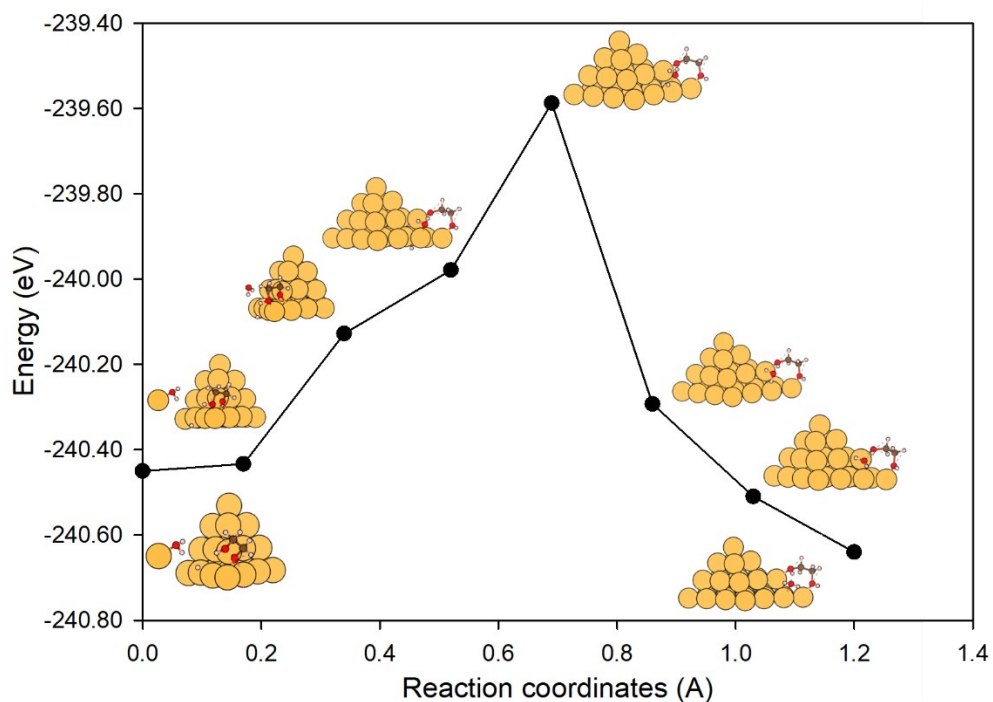

**Fig. S12.** MEP involved in  $*\text{CH}_2\text{OH}-\text{CH}_2\text{O} + \text{H}^+ + \text{e}^- \rightarrow *\text{CH}_2\text{OH}-\text{CH}_2\text{OH}$  on Cu-DAN via H-shuttling. Color code: Cu, orange; C, brown; O, red; H, pink. Energy barrier value is  $\Delta G^\ddagger(\text{U}^0) = 0.73$  eV.

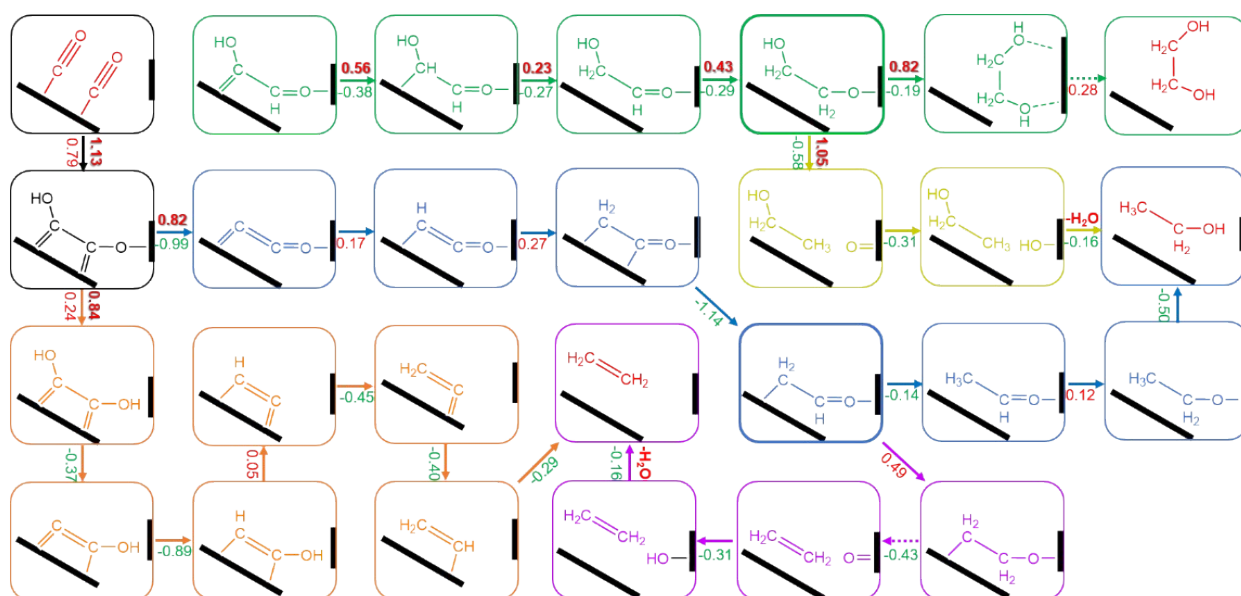

**Fig. S13** Chemical structure of reaction intermediates in different pathways on Cu-DAN. Pathways toward  $C_2$  products (ethylene, ethanol and ethylene glycol) beyond 2  $*CO$  are shown as colored-branches: orange,  $*COH-COH$  pathway toward  $C_2H_4$ ; blue,  $*C-CO$  pathway toward  $C_2H_5OH$ ; purple,  $*C-CO$  pathway bifurcating to  $C_2H_4$ ; green,  $*COH-CHO$  pathway toward  $C_2H_6O_2$ , and; brown,  $*COH-CHO$  pathway bifurcating to  $C_2H_5OH$ . Reaction barrier  $\Delta G^\ddagger$  values at 0 V vs RHE appear in bolded- and shaded-font. Free energy change  $\Delta G$  values appear in standard-font. Green and red values denote, respectively, exergonic and endergonic process. The solid-arrow denotes proton-coupled electron transfer ( $H^+ + e^-$ ), and dotted-arrow denotes desorption. The unit of energy is eV.

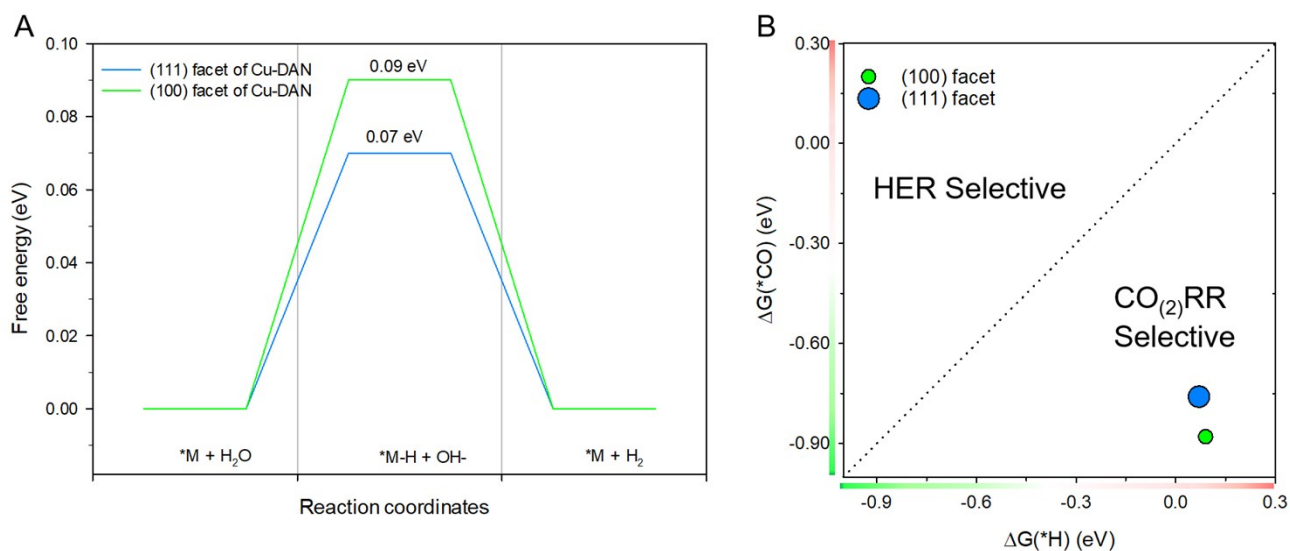

**Fig. S14.** (A) Free energy diagram for HER on Cu-DAN. (B) Comparison between hydrogen adsorption free energy  $\Delta G(*H)$  and carbon monoxide adsorption free energy  $\Delta G(*CO)$  on (111) and (100) facets of Cu-DAN.

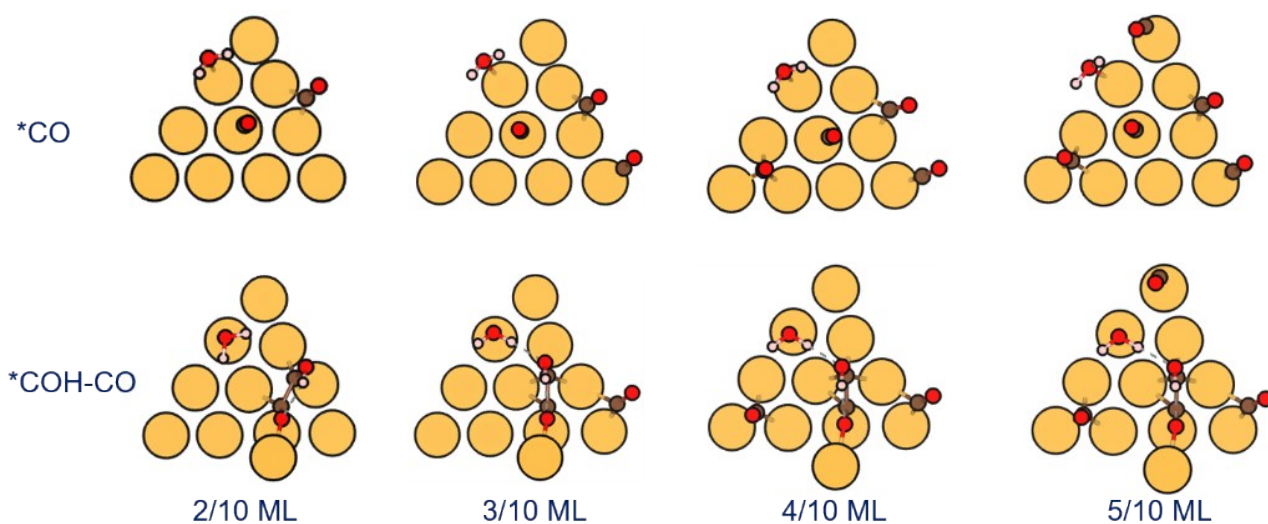

**Fig. S15.** Atomic structures of  $\text{*CO}$  and  $\text{*COH-CO}$  under  $\text{*CO}$  coverage of 2/10, 3/10, 4/10 and 5/10 ML. Color code: Cu, orange; C, brown; O, red; H, pink.

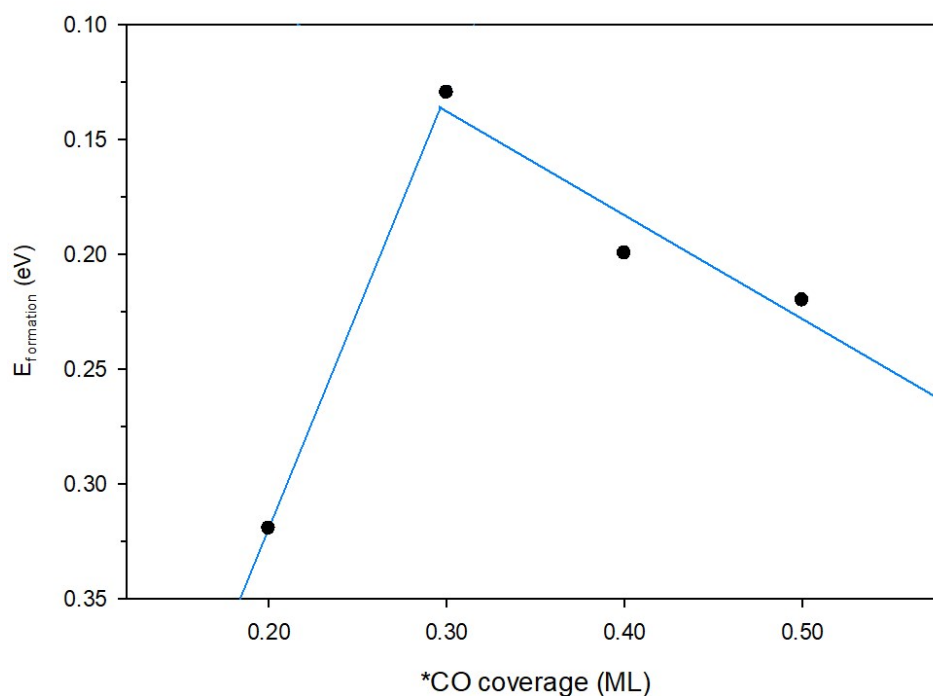

**Fig. S16.** Volcano-type relationship between  $\text{*CO}$  coverage and formation energy of  $\text{*COH-CO}$ .

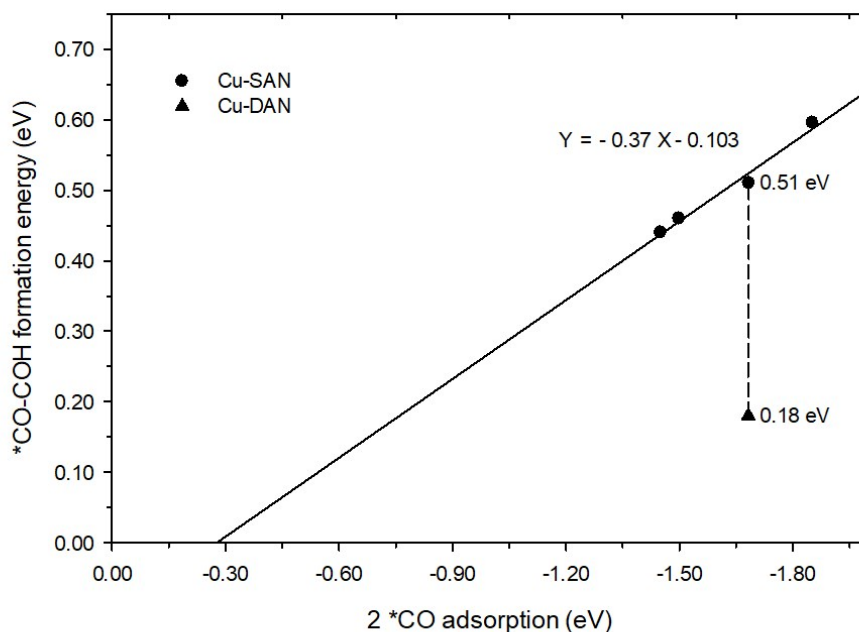

**Fig. S17.** Linear scaling relations between 2\*CO adsorption and \*COH–CO formation free energies on Cu-SAN and Cu-DAN.

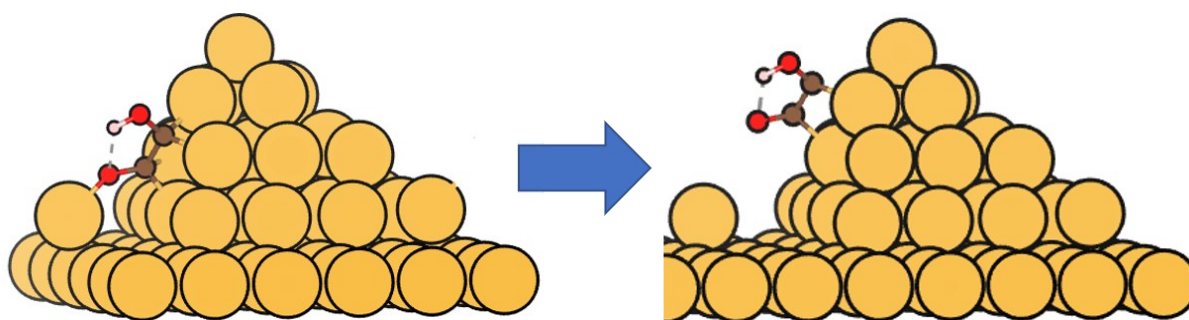

**Fig. S18.** Computation of Cu–O bond strength. To compute the strength of the bond between  $\beta$ O and Cu of the adjacent nanopyramid, we moved the \*COH–CO along the nanopyramid surface until the Cu–O bond was completely broken. The energy difference between the translated structure with original is 2.63 eV (253.76 kJ mol<sup>-1</sup>), and reflects the Cu–O bond strength. All atoms were fixed to compute the single-point energy of the structure.





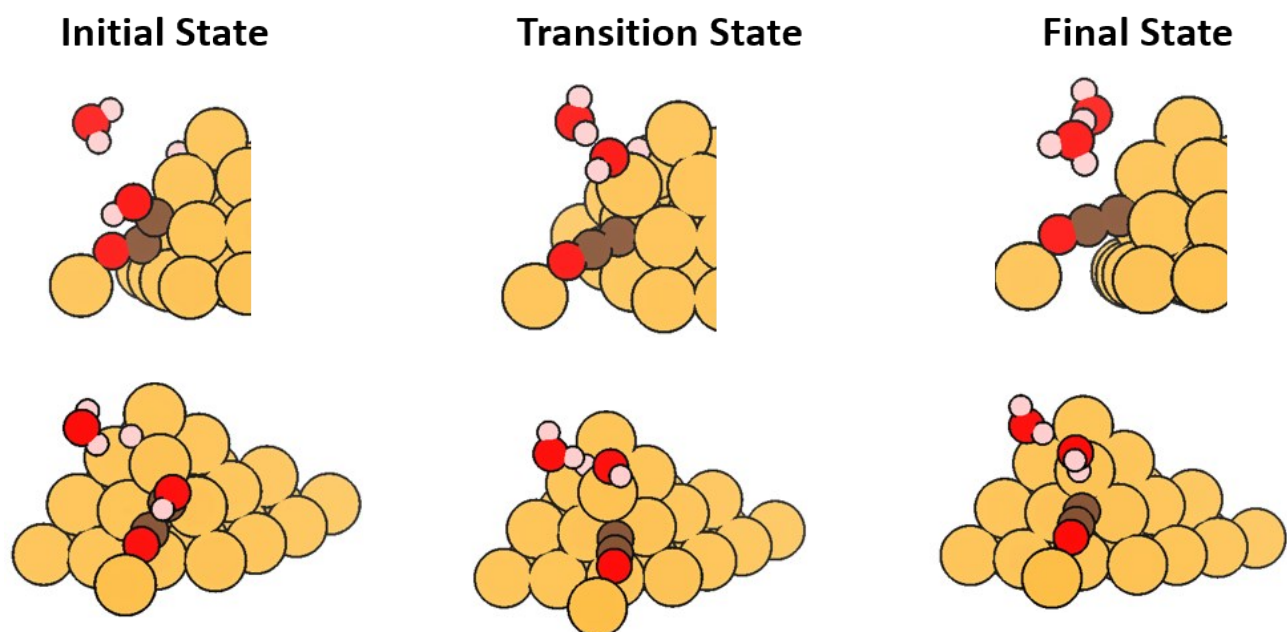

**Fig. S19.** Side and front view of optimized structures of, respectively, the initial, transition and final states involved in  $^*\text{COH-CO}$  reduction to  $^*\text{C-CO}$  on Cu-DAN. Color code: Cu, orange; C, brown; O, red; H, pink.

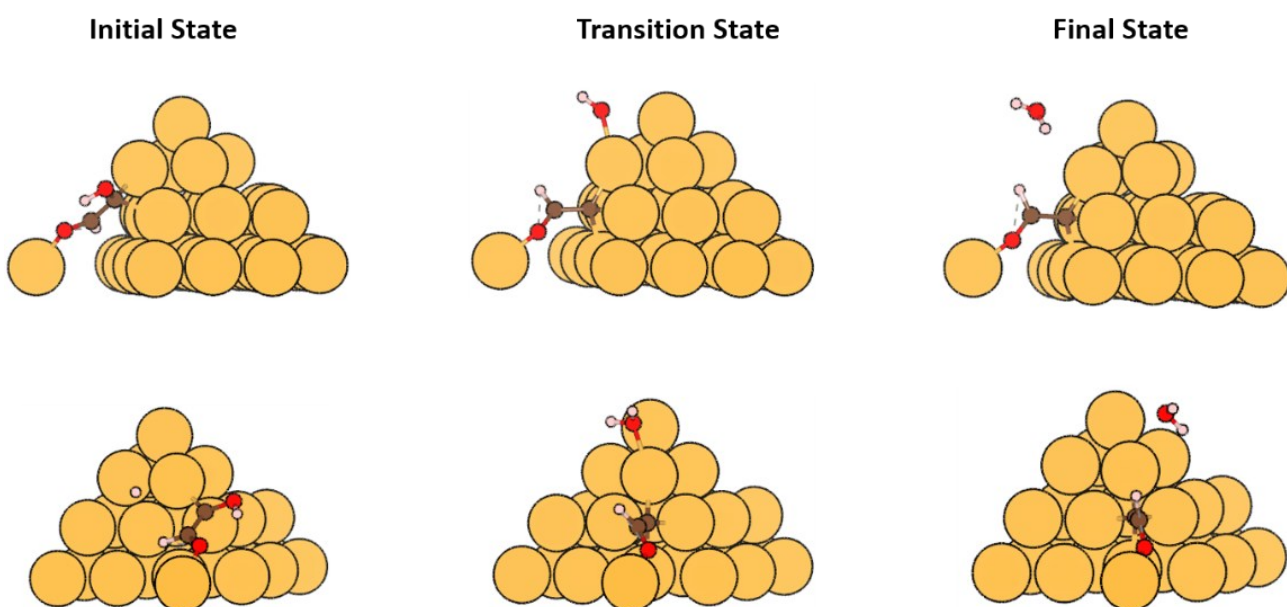

**Fig. S20.** Side and front view of optimized structures of, respectively, the initial, transition and final states involved in  $^*\text{COH-CHO}$  reduction to  $^*\text{C-CHO}$  on Cu-DAN ( $^*\text{COH-CHO} + \text{H}^+ + \text{e}^- \rightarrow ^*\text{C-CHO} + \text{H}_2\text{O}$ ). Color code: Cu, orange; C, brown; O, red; H, pink.

## Supplementary Note 1

### Stability of Cu-DAN

Stability is a prerequisite for electrocatalytic materials. This is closely related to the experimental feasibility and catalytic activity for long-term use.

The dissolution potential ( $U_{\text{diss}}$ ) of the surface atoms on nanopyramid, which assess the dissolution-resistance of one surface atom from the nanopyramid into water under an applied potential,<sup>8</sup> is calculated as:

$$U_{\text{diss}} = U_{\text{diss}(\text{Cu})}^0 - E_f / ne$$

where  $U_{\text{diss}(\text{Cu})}^0$  and  $n$  denote standard reduction potential of Cu and the number of electrons transferred during dissolution. The values are 0.34 V and 2, respectively.

$E_f$ , the formation energy of one surface Cu atom, is defined as:

$$E_f = E_{\text{nanopyramid}} - E_{\text{less}} - E_{\text{Cu}}$$

where  $E_{\text{nanopyramid}}$  is the total energy,  $E_{\text{less}}$  is the energy of nanopyramid without one surface Cu atom and  $E_{\text{Cu}}$  is the energy of isolated Cu atom.

The calculated positive  $U_{\text{diss}}$  of 1.72 V shows that the surface Cu atoms will be stable under electrochemical environments.

In addition, we carried out *ab initio* molecular dynamics (AIMD) simulations to explore the thermodynamic stability of the surface atoms of the Cu-DAN at 300K, as shown in Figure S2. We found that the thermal oscillations of surface Cu atoms occur near the equilibrium position following relaxation for 6 ps, and that the structure showed no significant structural distortion. This finding confirms thermodynamic stability of Cu-DAN.

## Supplementary Note 2

### Hydrogen evolution reaction (HER) on Cu-DAN

We used DFT computations to identify that the most stable \*H adsorption sites, with minimum adsorption energy on Cu nanopyramids, is the 4-fold hollow site for (100) facets, and HCP hollow site for (111) facets, respectively. The performance of these active sites for the Volmer step of HER in alkaline condition ( $*M + H_2O + e^- \rightarrow *M-H + OH^-$ ) was investigated using free energy as an indicator. The free energy change of the Volmer step can be computed from:

$$\Delta G_{volmer} = (G_{*M-H} + G_{OH^-}) - (G_{*M} + G_{H_2O} + G_{e^-})$$

where  $G_{*M}$  is the free energy of the original pyramidal structure,  $G_{*M-H}$  is the free energy of the pyramidal structure with adsorbed \*H,  $G_{H_2O}$  and  $G_{H_2}$  is the free energy of a  $H_2O$  molecule and a  $H_2$  molecule.  $G_{OH^-}$  is the free energy of a hydroxide ion ( $OH^-$ ) obtained as,  $G_{OH^-} = G_{H_2O} - G_{H_2}/2$ .

The computational results are given in Figure S14A, and a comparison with \*CO adsorption energy on the same sites is given in Figure S14B that indicates suppression of competing HER on Cu-DAN.

### Supplementary Note 3

#### Effect of \*CO coverage on the formation of \*COH-CO

The coverage of \*CO is expressed in monolayer (ML) units. These are defined as the number of adsorbed \*CO molecules ( $n$ ,  $n = 2, 3, 4$  and  $5$  in this simulation) divided by the total number of atoms on one facet of Cu-DAN (10). The formation energy of intermediate \*COH-CO under such \*CO coverage then is computed as:

$$E_{\text{formation}} = E_{\text{total}} - (E_{\text{slab}+n*\text{CO}} + E_{\text{H}_2}/2)$$

where  $E_{\text{total}}$  is the energy of the total system,  $E_{\text{slab}+n*\text{CO}}$  is the energy of Cu-CAN with adsorption of  $n$  \*CO molecules.  $E_{\text{H}_2}$  is the energy of a hydrogen molecule (-6.76 eV).

We began by constructing the Cu-DAN surface with two \*CO adsorbates (\*CO coverage = 2/10 ML). To investigate the influence of \*CO coverage on the formation of \*COH-CO we added more \*CO molecules on the surface to gradually increase the \*CO coverage from 2/10 to 5/10 ML as is shown in Figure S15. We found volcano-type relationships between \*CO coverage and formation energy of \*COH-CO (Figure S16). With the increase of \*CO coverage, the formation energy of \*COH-CO increases first and reaches a peak at 3/10 ML. This is consistent with experimental observations that a higher \*CO coverage promotes C-C coupling.

As the \*CO coverage increases further, the formation energy of \*COH-CO decreases. This is because the steric hindrance of O atom caused by excessive \*CO adsorption destabilizes the dimer intermediate \*COH-CO.

## Supplementary Note 4

### **\*COH–CHO formation on planar Cu (100)**

\*COH–CHO is the precursor of glycolaldehyde (CH<sub>2</sub>OH–CHO). Two mechanisms have been hypothesized toward its formation on planar Cu surface.<sup>1</sup> These are: 1) \*COH–CO + H → \*COH–CHO, and; 2) \*CHO + \*COH → \*COH–CHO. On planar Cu (100) surface \*COH–COH prevails over \*COH–CHO. The reason is discussed in detail.

For the first mechanism Cheng et al.<sup>1</sup> hypothesized a pathway on planar Cu (100) facets in which \*COH–CO formation is followed by hydrogenation of βO atoms. This rules out the possibility of hydrogenation of βC to \*COH–CHO. We attribute this to the instability of intermediate \*COH–CHO. The structures of \*COH–CHO and \*COH–COH are tautomeric. The former is comparatively unstable because it is vertically adsorbed on surface via a double bond, and because it has a free radical on the C atom. We computed \*COH–CHO to be 0.26 eV less stable than \*COH–COH on planar Cu (100) surface.

This finding means the bulk of \*COH–CHO are spontaneously tautomerized to \*COH–COH, despite being formed first. Because \*COH–CHO is not a stable molecular compound with a significant concentration on planar Cu (100) surface, the \*COH–CHO pathway is blocked. Additionally if the formation of \*COH–CHO follows the second mechanism, it is difficult for it to proceed on a planar surface. \*COH and \*CHO are preferably, respectively, stabilized on Cu (111) and Cu (100) surface.<sup>4</sup>

It is reportedly rare for those two adsorbates to simultaneously attain the kinetically reactable concentration on a homogeneous facet. This is the reason why we record a high-level barrier of 0.72 eV at 0 V vs RHE for \*COH–CHO formation on planar Cu (100) surface.

We conclude therefore that on a planar Cu (100) surface \*COH–CHO is not favored and the pathway is blocked.

**Table S1.** Free energy for gas phase species.

| <i>Gas Molecule</i>                   | <i>E</i><br>(eV) | <i>ZPE</i><br>(eV) | <i>-TS</i><br>(eV) | <i>G</i><br>(eV) |
|---------------------------------------|------------------|--------------------|--------------------|------------------|
| H <sub>2</sub> (g)                    | -6.75            | 0.27               | -0.41              | -6.89            |
| H <sub>2</sub> O (g)                  | -14.22           | 0.56               | -0.67              | -14.33           |
| CO (g)                                | -14.80           | 0.13               | -0.61              | -14.70           |
| CO <sub>2</sub> (g)                   | -23.01           | 0.31               | -0.66              | -23.36           |
| C <sub>2</sub> H <sub>4</sub> (g)     | -31.97           | 1.37               | -0.55              | -31.15           |
| C <sub>2</sub> H <sub>5</sub> OH (g)  | -46.88           | 2.13               | -0.60              | -45.35           |
| (CH <sub>2</sub> OH) <sub>2</sub> (g) | -53.31           | 2.27               | -0.65              | -51.69           |

**Table S2.** Summary of elementary reaction steps, hydrogen transfer model, reaction barriers at various electrode potentials and involved parameter for computation.  $\Delta G(0V)$  and  $\Delta G^\ddagger(0V)$  are the free energy change and reaction barrier without potential bias,  $\Delta G^\ddagger(U^0)$  is the reaction barrier under  $U^0$ .  $U^0$  is the equilibrium potential for the reductive adsorption of one proton in the system, and  $\beta'$  is the reaction symmetry factor, as defined in the manuscript. The two hydrogen models considered were, 1) Langmuir-Hinshelwood (LH) mechanism (i.e. direct transfer of an adsorbed \*H), and 2) Eley-Rideal (ER) mechanism (i.e. water molecule shuttles an adsorbed \*H). Adding hydrogen to carbon species via LH mechanism always gives lower kinetic barriers, compared with hydrogen transfer via ER mechanism. ER mechanism contributed to a lower kinetic barrier when hydrogen is added to oxygen species.<sup>5,6</sup> For all steps computed with H-shuttling, one H<sub>2</sub>O molecule was included in the computation.

| No. | Catalyst | Reaction Steps                                                                                                | Model               | $\Delta G(0V)$ | $\Delta G^\ddagger(U^0)$ | $U^0$ <sup>a</sup> | $\beta'$ <sup>b</sup> | $\Delta G^\ddagger(0V)$ |
|-----|----------|---------------------------------------------------------------------------------------------------------------|---------------------|----------------|--------------------------|--------------------|-----------------------|-------------------------|
| 1a  | Cu-DAN   | *CO+*CO+H <sup>+</sup> +e <sup>-</sup> →*COH-CO                                                               | H-shuttling         | 0.79           | 1.07                     | -0.12              | 0.49                  | 1.13                    |
| 1b  | Cu-SAN   |                                                                                                               | H-shuttling         | 0.94           | 1.50                     | -0.25              | 0.49                  | 1.63                    |
| 2   | Cu-DAN   | *COH-CO+ H <sup>+</sup> +e <sup>-</sup> →*COH-COH                                                             | H-shuttling         | 0.24           | 0.76                     | -0.17              | 0.49                  | 0.84                    |
| 3a  | Cu-DAN   | *COH-CO+ H <sup>+</sup> +e <sup>-</sup> →*C-CO + H <sub>2</sub> O                                             | H-shuttling         | -0.99          | 0.72                     | -0.21              | 0.49                  | 0.82                    |
| 3b  | Cu-DAN   |                                                                                                               | surface *H transfer | -1.25          | 1.66                     | -0.39              | 0.49                  | 1.86                    |
| 4a  | Cu-DAN   | *COH-CO+ H <sup>+</sup> +e <sup>-</sup> →*COH-CHO                                                             | surface *H transfer | -0.21          | 0.41                     | -0.10              | 0.49                  | 0.45                    |
| 4b  | Cu(100)  |                                                                                                               | surface *H transfer | -0.04          | 0.69                     | -0.05              | 0.49                  | 0.72                    |
| 5   | Cu-DAN   | *COH-CHO+ H <sup>+</sup> +e <sup>-</sup> →*CHOH-CHO                                                           | surface *H transfer | -0.38          | 0.52                     | -0.08              | 0.49                  | 0.56                    |
| 6   | Cu-DAN   | *COH-CHO+ H <sup>+</sup> +e <sup>-</sup> →*C-CHO                                                              | surface *H transfer | 0.04           | 1.02                     | -0.11              | 0.49                  | 1.07                    |
| 7   | Cu-DAN   | *CHOH-CHO+ H <sup>+</sup> +e <sup>-</sup> →*CH <sub>2</sub> OH-CHO                                            | surface *H transfer | -0.27          | 0.25                     | 0.04               | 0.49                  | 0.23                    |
| 8   | Cu-DAN   | *CH <sub>2</sub> OH-CHO+ H <sup>+</sup> +e <sup>-</sup> →*CH <sub>2</sub> OH-CH <sub>2</sub> O                | surface *H transfer | -0.29          | 0.39                     | -0.08              | 0.49                  | 0.43                    |
| 9   | Cu-DAN   | *CH <sub>2</sub> OH-CH <sub>2</sub> O+ H <sup>+</sup> +e <sup>-</sup> →CH <sub>2</sub> OH-CH <sub>3</sub> +*O | surface *H transfer | -0.58          | 0.98                     | -0.15              | 0.49                  | 1.05                    |
| 10  | Cu-DAN   | *CH <sub>2</sub> OH-CH <sub>2</sub> O+ H <sup>+</sup> +e <sup>-</sup> →*CH <sub>2</sub> OH-CH <sub>2</sub> OH | H-shuttling         | -0.19          | 0.73                     | -0.18              | 0.49                  | 0.82                    |

<sup>a</sup>  $U^0$  is the potential where reaction  $*A+H^++e^- \rightarrow *A+*H$  possess zero free energy change i.e.  $G(*A+*H) + eU^0 - G(*A) - 1/2H_2 = 0$ , where \*A means the system with A adsorbed on the surface.

<sup>b</sup>  $\beta'$  is the reaction symmetry factor, which is approximated as 0.49 for all elementary steps.<sup>7</sup>















**Table S9.** Atomic coordinates of IS, TS, and FS of Reaction 4c listed in Table S1.

| Reaction 4b: *COH-CO+ H <sup>+</sup> +e <sup>-</sup> →*COH-CHO on planar Cu (100) via surface *H transfer                                                                                                                                                                                                                                                                                                                                                                                                                                                                                                                                                                                                                                                                                                                                                                                                                                                                                                                                                                                                                                                                                                                                                                                                                                                                                                                                                                                                                                                                                                                                                                                                                                                                                                                                                                                                                                                                                                                                                                                                                                                                                                                                                                                                                                                                                                                                                                                                                                                                                                                                                                                                                                                                                                               |  |                                                                                                                                                                                                                                                                                                                                                                                                                                                                                                                                                                                                                                                                                                                                                                                                                                                                                                                                                                                                                                                                                                                                                                                                                                                                                                                                                                                                                                                                                                                                                                                                                                                                                                                                                                                                                                                                                                                                                                                                                                                                                                                                                                                                                                                                                                                                                                                                                                                                                                                                                                                                                                                                                                                                                                                                              |  |                                                                                                                                                                                                                                                                                                                                                                                                                                                                                                                                                                                                                                                                                                                                                                                                                                                                                                                                                                                                                                                                                                                                                                                                                                                                                                                                                                                                                                                                                                                                                                                                                                                                                                                                                                                                                                                                                                                                                                                                                                                                                                                                                                                                                                                                                                                                                                                                                                                                                                                                                                                                                                                                                                                                                                                                                         |  |
|-------------------------------------------------------------------------------------------------------------------------------------------------------------------------------------------------------------------------------------------------------------------------------------------------------------------------------------------------------------------------------------------------------------------------------------------------------------------------------------------------------------------------------------------------------------------------------------------------------------------------------------------------------------------------------------------------------------------------------------------------------------------------------------------------------------------------------------------------------------------------------------------------------------------------------------------------------------------------------------------------------------------------------------------------------------------------------------------------------------------------------------------------------------------------------------------------------------------------------------------------------------------------------------------------------------------------------------------------------------------------------------------------------------------------------------------------------------------------------------------------------------------------------------------------------------------------------------------------------------------------------------------------------------------------------------------------------------------------------------------------------------------------------------------------------------------------------------------------------------------------------------------------------------------------------------------------------------------------------------------------------------------------------------------------------------------------------------------------------------------------------------------------------------------------------------------------------------------------------------------------------------------------------------------------------------------------------------------------------------------------------------------------------------------------------------------------------------------------------------------------------------------------------------------------------------------------------------------------------------------------------------------------------------------------------------------------------------------------------------------------------------------------------------------------------------------------|--|--------------------------------------------------------------------------------------------------------------------------------------------------------------------------------------------------------------------------------------------------------------------------------------------------------------------------------------------------------------------------------------------------------------------------------------------------------------------------------------------------------------------------------------------------------------------------------------------------------------------------------------------------------------------------------------------------------------------------------------------------------------------------------------------------------------------------------------------------------------------------------------------------------------------------------------------------------------------------------------------------------------------------------------------------------------------------------------------------------------------------------------------------------------------------------------------------------------------------------------------------------------------------------------------------------------------------------------------------------------------------------------------------------------------------------------------------------------------------------------------------------------------------------------------------------------------------------------------------------------------------------------------------------------------------------------------------------------------------------------------------------------------------------------------------------------------------------------------------------------------------------------------------------------------------------------------------------------------------------------------------------------------------------------------------------------------------------------------------------------------------------------------------------------------------------------------------------------------------------------------------------------------------------------------------------------------------------------------------------------------------------------------------------------------------------------------------------------------------------------------------------------------------------------------------------------------------------------------------------------------------------------------------------------------------------------------------------------------------------------------------------------------------------------------------------------|--|-------------------------------------------------------------------------------------------------------------------------------------------------------------------------------------------------------------------------------------------------------------------------------------------------------------------------------------------------------------------------------------------------------------------------------------------------------------------------------------------------------------------------------------------------------------------------------------------------------------------------------------------------------------------------------------------------------------------------------------------------------------------------------------------------------------------------------------------------------------------------------------------------------------------------------------------------------------------------------------------------------------------------------------------------------------------------------------------------------------------------------------------------------------------------------------------------------------------------------------------------------------------------------------------------------------------------------------------------------------------------------------------------------------------------------------------------------------------------------------------------------------------------------------------------------------------------------------------------------------------------------------------------------------------------------------------------------------------------------------------------------------------------------------------------------------------------------------------------------------------------------------------------------------------------------------------------------------------------------------------------------------------------------------------------------------------------------------------------------------------------------------------------------------------------------------------------------------------------------------------------------------------------------------------------------------------------------------------------------------------------------------------------------------------------------------------------------------------------------------------------------------------------------------------------------------------------------------------------------------------------------------------------------------------------------------------------------------------------------------------------------------------------------------------------------------------------|--|
| IS                                                                                                                                                                                                                                                                                                                                                                                                                                                                                                                                                                                                                                                                                                                                                                                                                                                                                                                                                                                                                                                                                                                                                                                                                                                                                                                                                                                                                                                                                                                                                                                                                                                                                                                                                                                                                                                                                                                                                                                                                                                                                                                                                                                                                                                                                                                                                                                                                                                                                                                                                                                                                                                                                                                                                                                                                      |  | TS                                                                                                                                                                                                                                                                                                                                                                                                                                                                                                                                                                                                                                                                                                                                                                                                                                                                                                                                                                                                                                                                                                                                                                                                                                                                                                                                                                                                                                                                                                                                                                                                                                                                                                                                                                                                                                                                                                                                                                                                                                                                                                                                                                                                                                                                                                                                                                                                                                                                                                                                                                                                                                                                                                                                                                                                           |  | FS                                                                                                                                                                                                                                                                                                                                                                                                                                                                                                                                                                                                                                                                                                                                                                                                                                                                                                                                                                                                                                                                                                                                                                                                                                                                                                                                                                                                                                                                                                                                                                                                                                                                                                                                                                                                                                                                                                                                                                                                                                                                                                                                                                                                                                                                                                                                                                                                                                                                                                                                                                                                                                                                                                                                                                                                                      |  |
| Cu C H O<br>1.00000000000000<br>10.903325675399996 0.000000000000000 0.000000000000000<br>0.000000000000000 10.903325675399996 0.000000000000000<br>0.000000000000000 0.000000000000000 10.634441891799999<br>Cu C H O<br>36 2 2 2<br>Selective dynamics<br>Direct                                                                                                                                                                                                                                                                                                                                                                                                                                                                                                                                                                                                                                                                                                                                                                                                                                                                                                                                                                                                                                                                                                                                                                                                                                                                                                                                                                                                                                                                                                                                                                                                                                                                                                                                                                                                                                                                                                                                                                                                                                                                                                                                                                                                                                                                                                                                                                                                                                                                                                                                                      |  | Cu C H O<br>1.00000000000000<br>10.903325675399996 0.000000000000000 0.000000000000000<br>0.000000000000000 10.903325675399996 0.000000000000000<br>0.000000000000000 0.000000000000000 10.634441891799999<br>Cu C H O<br>36 2 2 2<br>Selective dynamics<br>Direct                                                                                                                                                                                                                                                                                                                                                                                                                                                                                                                                                                                                                                                                                                                                                                                                                                                                                                                                                                                                                                                                                                                                                                                                                                                                                                                                                                                                                                                                                                                                                                                                                                                                                                                                                                                                                                                                                                                                                                                                                                                                                                                                                                                                                                                                                                                                                                                                                                                                                                                                           |  | Cu C H O<br>1.00000000000000<br>10.903325675399996 0.000000000000000 0.000000000000000<br>0.000000000000000 10.903325675399996 0.000000000000000<br>0.000000000000000 0.000000000000000 10.634441891799999<br>Cu C H O<br>36 2 2 2<br>Selective dynamics<br>Direct                                                                                                                                                                                                                                                                                                                                                                                                                                                                                                                                                                                                                                                                                                                                                                                                                                                                                                                                                                                                                                                                                                                                                                                                                                                                                                                                                                                                                                                                                                                                                                                                                                                                                                                                                                                                                                                                                                                                                                                                                                                                                                                                                                                                                                                                                                                                                                                                                                                                                                                                                      |  |
| 0.000000000000000 0.000000000000000 0.000000000000000 F F F<br>0.1661041259954941 0.0008695378088244 0.1619882777796406 T T T<br>0.9995854207921430 0.1670516348230785 0.1649245184631450 F F T<br>0.166666666666643 0.166666666666643 0.000000000000000 F F F<br>0.000000000000000 0.333333333333357 0.000000000000000 F F F<br>0.1664415101985676 0.333290967530651 0.161782274428833 T T T<br>0.9997562743553990 0.4997578192274045 0.1622764859777086 T T T<br>0.166666666666643 0.500000000000000 0.000000000000000 F F F<br>0.000000000000000 0.666666666666643 0.000000000000000 F F F<br>0.1639901206847034 0.6682089858481457 0.1611648800777758 T T T<br>0.9991196295680950 0.8338781576929283 0.1620198075772152 T T T<br>0.166666666666643 0.833333333333357 0.000000000000000 F F F<br>0.333333333333357 0.000000000000000 0.000000000000000 F F F<br>0.5002715303656241 0.0002944146804081 0.1623122392668561 T T T<br>0.3336233147562353 0.1663903303844037 0.1621524171165534 T T T<br>0.500000000000000 0.166666666666643 0.000000000000000 F F F<br>0.333333333333357 0.333333333333357 0.000000000000000 F F F<br>0.5025121458238192 0.3314724932912396 0.1678101234102215 T T T<br>0.3318164580322804 0.5016036180781258 0.1692018541826215 T T T<br>0.500000000000000 0.500000000000000 0.000000000000000 F F F<br>0.333333333333357 0.666666666666643 0.000000000000000 F F F<br>0.4981462177966607 0.6681366770134289 0.1692124547645107 T T T<br>0.3317795142791436 0.8361575700248703 0.1611647837928961 T T T<br>0.500000000000000 0.833333333333357 0.000000000000000 F F F<br>0.666666666666643 0.000000000000000 0.000000000000000 F F F<br>0.83329676754448812 0.0002971881994578 0.1649166396738098 T T T<br>0.6682781463880616 0.1644864174007575 0.1651160889588236 F T T<br>0.833333333333357 0.166666666666643 0.000000000000000 F F F<br>0.666666666666643 0.333333333333357 0.000000000000000 F F F<br>0.8354067672288140 0.3318334795686460 0.1649933419499269 T T T<br>0.6684751656146590 0.497672363318578 0.1677835236298524 T T T<br>0.833333333333357 0.500000000000000 0.000000000000000 F F F<br>0.666666666666643 0.666666666666643 0.000000000000000 F F F<br>0.8336068064568966 0.6664258514133563 0.1621331480542856 T T T<br>0.6666895664454081 0.8334454813277262 0.1617969452907017 T T T<br>0.833333333333357 0.833333333333357 0.000000000000000 F F F<br>0.4554538836332186 0.5444410637074751 0.3044095668841552 T T T<br>0.5514402691501205 0.4484101218772729 0.3139921071042192 T T T<br>0.4611097447278152 0.5393161924450083 0.483285469834224 T T T<br>0.8309714754755351 0.1695980991580818 0.2185727790337578 T T T<br>0.4146957401267218 0.5849918964564399 0.4185270683446837 T T T<br>0.5901722201266092 0.4102828789059565 0.4167617771546612 T T T |  | 0.000000000000000 0.000000000000000 0.000000000000000 F F F<br>0.1660864284965375 0.000690524000273 0.1627564135632032 T T T<br>0.999828870111660 0.1668916261782245 0.1626618321231320 T T T<br>0.166666666676395 0.166666666676395 0.000000000000000 F F F<br>0.000000000000000 0.333333333123605 0.000000000000000 F F F<br>0.165822599191973 0.3326776229563612 0.1619516827540445 T T T<br>0.9997830061794007 0.4998960179630280 0.1625296523692658 T T T<br>0.16666666676395 0.500000000000000 0.000000000000000 F F F<br>0.000000000000000 0.66666666676395 0.000000000000000 F F F<br>0.1633564751298621 0.6681582706254641 0.1617415544105775 T T T<br>0.9993978075783454 0.8339086054070536 0.1627536257032900 T T T<br>0.16666666676395 0.833333333123605 0.000000000000000 F F F<br>0.333333333123605 0.000000000000000 0.000000000000000 F F F<br>0.5001249938557017 0.0002197588932932 0.1625404939251031 T T T<br>0.3328861589628708 0.1657047200658749 0.1619740438635099 T T T<br>0.500000000000000 0.166666666676395 0.000000000000000 F F F<br>0.333333333123605 0.333333333123605 0.000000000000000 F F F<br>0.5006357921907516 0.3309144818895444 0.1663883799392043 T T T<br>0.3334125651700385 0.4995335749729921 0.1678294464889087 T T T<br>0.500000000000000 0.500000000000000 0.000000000000000 F F F<br>0.333333333123605 0.66666666676395 0.000000000000000 F F F<br>0.5001992639966042 0.6667820022390294 0.1680663349987641 T T T<br>0.3318355744755442 0.8366914310170881 0.1617232703452010 T T T<br>0.500000000000000 0.833333333123605 0.000000000000000 F F F<br>0.66666666676395 0.000000000000000 0.000000000000000 F F F<br>0.8330999758248234 0.0003237298301323 0.1626557912014171 T T T<br>0.6674386438918012 0.1649206114047846 0.1634686225089745 T T T<br>0.833333333123605 0.16666666676395 0.000000000000000 F F F<br>0.66666666676395 0.333333333123605 0.000000000000000 F F F<br>0.835419044383710 0.3325601912296752 0.1634518135231096 T T T<br>0.6689797095209409 0.4993305772400200 0.166504791496560 T T T<br>0.833333333123605 0.500000000000000 0.000000000000000 F F F<br>0.66666666676395 0.66666666676395 0.000000000000000 F F F<br>0.8342751768706803 0.6671091429721240 0.1619770986975105 T T T<br>0.6673077023610385 0.8341505597131198 0.1619687885209637 T T T<br>0.833333333123605 0.833333333123605 0.000000000000000 F F F<br>0.4315929954476401 0.5676622453318021 0.3126968767666341 T T T<br>0.5127388659590715 0.4918038624039694 0.3746750242326554 T T T<br>0.3773172475163558 0.6196597526995888 0.4842695374618884 T T T<br>0.6272254083304288 0.3726698310489057 0.2440934425380004 T T T<br>0.3583034425459599 0.6391831356396294 0.3964899238392943 T T T<br>0.5604084871526547 0.4478124346847349 0.4646995466481276 T T T |  | 0.000000000000000 0.000000000000000 0.000000000000000 F F F<br>0.1656183641702520 0.0009120206962821 0.1625777155000722 T T T<br>0.9996863978847994 0.1668664325953029 0.1627126800127553 T T T<br>0.166666667033496 0.166666667033496 0.000000000000000 F F F<br>0.000000000000000 0.333333332966504 0.000000000000000 F F F<br>0.1665743031880270 0.3303611318288907 0.1619518881803572 T T T<br>0.9991427312927184 0.4993331392748290 0.1625478197274055 T T T<br>0.166666667033496 0.500000000000000 0.000000000000000 F F F<br>0.000000000000000 0.666666667033496 0.000000000000000 F F F<br>0.1622367575357500 0.6677071395809152 0.1622162458447615 T T T<br>0.9991126624570652 0.8342478379066895 0.1625551841130585 T T T<br>0.166666667033496 0.833333332966504 0.000000000000000 F F F<br>0.333333332966504 0.000000000000000 0.000000000000000 F F F<br>0.5006544469543923 0.0008257786984203 0.1626075557627554 T T T<br>0.3329985705370204 0.1657798649206059 0.1628190670802992 T T T<br>0.500000000000000 0.166666667033496 0.000000000000000 F F F<br>0.333333332966504 0.333333332966504 0.000000000000000 F F F<br>0.5001192642486006 0.3299752870446936 0.1618319291567784 T T T<br>0.333453045168431 0.4990121075085339 0.1676474627907450 T T T<br>0.500000000000000 0.500000000000000 0.000000000000000 F F F<br>0.333333332966504 0.666666667033496 0.000000000000000 F F F<br>0.5000054676479334 0.6671354351717098 0.1680288414207116 T T T<br>0.3322061947958173 0.8380210143808798 0.1620445200392823 T T T<br>0.500000000000000 0.833333332966504 0.000000000000000 F F F<br>0.666666667033496 0.000000000000000 0.000000000000000 F F F<br>0.8331263542994207 0.0001650938241613 0.1627000399878095 T T T<br>0.6670816427661515 0.1661724664039810 0.1625402005455117 T T T<br>0.833333332966504 0.166666667033496 0.000000000000000 F F F<br>0.666666667033496 0.333333332966504 0.000000000000000 F F F<br>0.8337281909035029 0.3329582240493775 0.1625430453029703 T T T<br>0.6689268903690056 0.4999588078432516 0.1617648901991565 T T T<br>0.833333332966504 0.500000000000000 0.000000000000000 F F F<br>0.666666667033496 0.666666667033496 0.000000000000000 F F F<br>0.8341611197343570 0.6669487047425560 0.1627844198494415 T T T<br>0.6667821242038060 0.8332780704947425 0.1619951397918860 T T T<br>0.833333332966504 0.833333332966504 0.000000000000000 F F F<br>0.4077626903381310 0.5908809374249930 0.3109118082981768 T T T<br>0.4841703392037808 0.5201356331287620 0.3972210108965136 T T T<br>0.3444777582969926 0.650923916088790 0.466071836578153 T T T<br>0.5514938920491012 0.4553852715759961 0.3518780932489524 T T T<br>0.3274867100251982 0.6671011635961941 0.3754455049486158 T T T<br>0.4749276522117104 0.5311597608130554 0.5130415835288753 T T T |  |





**Table S11.** Atomic coordinates of IS, TS, and FS of Reaction 5 listed in Table S1.

| Reaction 6: *COH-CHO+ H <sup>+</sup> +e <sup>-</sup> →*C-CHO on Cu-DAN via surface *H transfer                                                                                                                        |                                                                |                                                                |                                                                                                                                                                                                                       |                                                                |                                                                |                                                                                                                                                                                                                       |                                                                |                                                                |                                                                |
|-----------------------------------------------------------------------------------------------------------------------------------------------------------------------------------------------------------------------|----------------------------------------------------------------|----------------------------------------------------------------|-----------------------------------------------------------------------------------------------------------------------------------------------------------------------------------------------------------------------|----------------------------------------------------------------|----------------------------------------------------------------|-----------------------------------------------------------------------------------------------------------------------------------------------------------------------------------------------------------------------|----------------------------------------------------------------|----------------------------------------------------------------|----------------------------------------------------------------|
| IS                                                                                                                                                                                                                    |                                                                |                                                                | TS                                                                                                                                                                                                                    |                                                                |                                                                | FS                                                                                                                                                                                                                    |                                                                |                                                                |                                                                |
| Cu C H O<br>1.0000000000000000<br>12.855004805000001 0.0000000000000000 0.0000000000000000<br>-6.4291002405000004 11.1357880710000003 0.0000000000000000<br>0.0000000000000000 0.0000000000000000 15.2994003295999992 |                                                                |                                                                | Cu C H O<br>1.0000000000000000<br>12.855004805000001 0.0000000000000000 0.0000000000000000<br>-6.4291002405000004 11.1357880710000003 0.0000000000000000<br>0.0000000000000000 0.0000000000000000 15.2994003295999992 |                                                                |                                                                | Cu C H O<br>1.0000000000000000<br>12.855004805000001 0.0000000000000000 0.0000000000000000<br>-6.4291002405000004 11.1357880710000003 0.0000000000000000<br>0.0000000000000000 0.0000000000000000 15.2994003295999992 |                                                                |                                                                |                                                                |
| Cu C H O<br>55 2 3 2<br>Selective dynamics<br>Direct                                                                                                                                                                  |                                                                |                                                                | Cu C H O<br>55 2 3 2<br>Selective dynamics<br>Direct                                                                                                                                                                  |                                                                |                                                                | Cu C H O<br>55 2 3 2<br>Selective dynamics<br>Direct                                                                                                                                                                  |                                                                |                                                                |                                                                |
| 0.0000000000000000 0.0000000000000000 0.0000000000000000 F F F                                                                                                                                                        | 0.0000000000000000 0.0000000000000000 0.0000000000000000 F F F | 0.0000000000000000 0.0000000000000000 0.0000000000000000 F F F | 0.0000000000000000 0.0000000000000000 0.0000000000000000 F F F                                                                                                                                                        | 0.0000000000000000 0.0000000000000000 0.0000000000000000 F F F | 0.0000000000000000 0.0000000000000000 0.0000000000000000 F F F | 0.0000000000000000 0.0000000000000000 0.0000000000000000 F F F                                                                                                                                                        | 0.0000000000000000 0.0000000000000000 0.0000000000000000 F F F | 0.0000000000000000 0.0000000000000000 0.0000000000000000 F F F | 0.0000000000000000 0.0000000000000000 0.0000000000000000 F F F |









## Supplementary References

- 1 T. Cheng, H. Xiao, W. A. Goddard III, *Proc. Natl. Acad. Sci. U.S.A.*, 2017, **114**, 8, 1795–1800.
- 2 Y. Lum, T. Cheng, W. A. Goddard III, J. W. Ager, *J. Am. Chem. Soc.*, 2018, **140**, 9337–9340.
- 3 F. Calle-Vallejo, M. T. M. Koper, *Angew Chem. Int. Ed.*, 2013, **52**, 28, 7282–7285.
- 4 G. Henkelman, H. J. Jónsson, *Chem. Phys.*, 2000, **113**, 9978-9985.
- 5 X. Nie, M. R. Esopi, M. J. Janik, A. Asthagiri, *Angew. Chem., Int. Ed.*, 2013, **52**, 2459–2462.
- 6 W. Luo, X. Nie, M. J. Janik, A. Asthagiri, *ACS Catal.*, 2016, **6**, 219–229.
- 7 J. A. Garza, T. A. Bell, M. Head-Gardon, *ACS Catal.*, 2018, **8**, 1490–1499.
